# Supplementary material
Source: PubMed Central journal article supplement (PMC5006735)
Supplement: ry152542suppa1.pdf [file ry152542suppa1.pdf]

**Table E1. PI-RADS Assessment Scores for PZ**

| DWI | T2 W  | DCE      | PI-RADS |
|-----|-------|----------|---------|
| 1   | Any * | Any      | 1       |
| 2   | Any   | Any      | 2       |
| 3   | Any   | Negative | 3       |
| 3   | Any   | Positive | 4       |
| 4   | Any   | Any      | 4       |
| 5   | Any   | Any      | 5       |

Note.—T2 W = T2 weighted.

\* Indicates score of 1–5.

**Table E2. PI-RADS Assessment Scores for TZ**

| T2 W | DWI   | DCE | PI-RADS |
|------|-------|-----|---------|
| 1    | Any * | Any | 1       |
| 2    | Any   | Any | 2       |
| 3    | ≤4    | Any | 3       |
| 3    | 5     | Any | 4       |
| 4    | Any   | Any | 4       |
| 5    | Any   | Any | 5       |

Note.—T2 W = T2 weighted.

\* Indicates score of 1–5.

**Table E3. PI-RADS Assessment of T2-weighted Imaging**

| PZ Score | Explanation                                                                                                                              |
|----------|------------------------------------------------------------------------------------------------------------------------------------------|
| 1        | Uniform hyperintense signal intensity (normal)                                                                                           |
| 2        | Linear or wedge-shaped hypointensity or diffuse mild hypointensity, usually indistinct margin                                            |
| 3        | Heterogeneous signal intensity or noncircumscribed, rounded, moderate hypointensity<br>Includes others that do not qualify as 2, 4, or 5 |
| 4        | Circumscribed, homogenous moderate hypointense focus/mass confined to prostate and <1.5 cm in greatest dimension                         |
| 5        | Same as 4 but ≥1.5 cm in greatest dimension or definite extraprostatic extension/invasive behavior                                       |
| TZ Score |                                                                                                                                          |
| 1        | Homogeneous intermediate signal intensity (normal)                                                                                       |
| 2        | Circumscribed hypointense or heterogeneous encapsulated nodule(s) (BPH)                                                                  |
| 3        | Heterogeneous signal intensity with obscured margins<br>Includes others that do not qualify as 2, 4, or 5                                |
| 4        | Lenticular or noncircumscribed, homogeneous, moderately hypointense, and < 1.5 cm in greatest dimension                                  |
| 5        | Same as 4, but ≥1.5 cm in greatest dimension or definite extraprostatic extension/invasive behavior                                      |

Note.—BPH = Benign prostatic hyperplasia.

**Table E4. PI-RADS Assessment of T2-weighted Imaging**

| PZ or TZ Score | Explanation                                                                                                     |
|----------------|-----------------------------------------------------------------------------------------------------------------|
| 1              | No abnormality (ie, normal) on ADC and high b-value DWI                                                         |
| 2              | Indistinct hypointense on ADC                                                                                   |
| 3              | Focal mildly/moderately hypointense on ADC and isointense/mildly hyperintense on high b-value DWI.              |
| 4              | Focal markedly hypointense on ADC and markedly hyperintense on high b-value DWI; < 1.5 cm in greatest dimension |
| 5              | Same as 4 but ≥1.5 cm in greatest dimension or definite extraprostatic extension/invasive behavior              |

**Table E5. PI-RADS Assessment of Dynamic Contrast-enhanced MR Imaging**

| Score    | PZ or TZ                                                                                                                                                                                                                |
|----------|-------------------------------------------------------------------------------------------------------------------------------------------------------------------------------------------------------------------------|
| Negative | No early enhancement, or diffuse enhancement not corresponding to a focal finding on T2-weighted imaging and/or DWI or focal enhancement corresponding to a lesion demonstrating features of BPH on T2-weighted imaging |
| Positive | Focal, and; earlier than or contemporaneously with enhancement of adjacent                                                                                                                                              |

Note.—BPH = Benign prostatic hyperplasia.

**Table E6. Reader Scoring Sheet**

| Feature                                                                |
|------------------------------------------------------------------------|
| PZ                                                                     |
| Focal (rather than indistinct) shape on DWI ADC (±)                    |
| Markedly hyperintense on high b-value DWI (±)                          |
| Markedly hypointense on ADC (±)                                        |
| Definite EPE or invasive behavior on T2-weighted imaging (±)           |
| Early enhancement in region of lesion (±)                              |
| Focal early enhancement in region of lesion (±)                        |
| Early enhancement that corresponds with finding on other sequences (±) |
| Lesion size (mm)                                                       |
| T2 score (1–5)                                                         |
| DWI score (1–5)                                                        |
| DCE score (±)                                                          |
| TZ                                                                     |
| Circumscribed (rather than obscured) margins (±)                       |
| Encapsulated (±)                                                       |
| Heterogeneous (rather than homogeneous) (±)                            |
| Moderately hypointense (±)                                             |
| Lenticular shape (±)                                                   |
| Definite EPE or invasive behavior on T2-weighted imaging (±)           |
| Focal (rather than indistinct) shape on DWI and ADC (±)                |
| Markedly hyperintense on high b-value DWI (±)                          |
| Markedly hypointense on ADC (±)                                        |
| Lesion size (mm)                                                       |
| T2 score (1–5)                                                         |
| DWI score (1–5)                                                        |

Note.—EPE = Extra-prostatic extension. (±) indicates that the feature was scored in a binary (present vs. absent) fashion; (1–5) indicates that the feature was scored by using a 1–5 scale.
